# Supplementary material
Source: Elsevier journal article supplement (https://www.sciencedirect.com/science/article/pii/S0009739X19301083)
Supplement: mmc1 [file S0009739X19301083:mmc1.docx]

**Encuesta a los Jefes de Unidades de Trasplante Hepático:**

Con motivo de conocer la situación y opinión actual sobre este tema se remite este breve cuestionario para valorar la accesibilidad al trasplante dentro del desarrollo profesional de los cirujanos

1.-Hospital al que pertenece (Opcional)

2.- ¿Cuantos cirujanos componen su Unidad de Trasplante?

3.- De los cirujanos de la Unidad hacen extracción.....

- Todos
- La Mayoría
- Un equipo independiente para extracciones
- Otras opciones (Explicar)

4.- De los cirujanos de la Unidad hacen hepatectomía....

- 1 o 2 de los cirujanos

- 3 o 4 de los cirujanos

- Más de 4 de os cirujanos

5.- De los cirujanos de la Unidad hacen implante....

- 1 o 2 de los cirujanos

- 3 o 4 de los cirujanos

- Más de 4 de os cirujanos

6.- ¿Cuantos cirujanos como máximo considera que deben tener autonomía para llevar a cabo trasplante?

7.- ¿Cual es la experiencia en años desde el final de la residencia del cirujano más joven del grupo?

- 1 o 2 años

- 3 a 5 años

- Más de 5 años

8.- ¿Cuantos cirujanos de menos de 5 años de experiencia hay en el grupo?

- Ninguno

- 1 o 2

- 3 a 5

-Más de 5

9.- ¿Cuantos cirujanos de más de 55 años hay en el grupo?

- Ninguno

- 1 o 2

- 3 a 5

-Más de 5

10.- En su Hospital para la contratación de un residente al terminar...

-Depende de la Dirección del Hospital

-Depende en gran medida del Jefe de Servicio o de Unidad

- Depende de la Bolsa de trabajo (con independencia de los anteriores)

- Otras (Explicar)

11.- ¿Considera que hay residentes y cirujanos jóvenes con interés en acceder al programa de trasplante?

12.- ¿Considera que tiene en su Hospital facilidad para enviar a formarse a un cirujano joven por un periodo prolongado?

13.- Los últimos cirujanos que han accedido al programa ha sido:

- Por haberse generado una plaza vacante por jubilación, baja, etc

- Por encima de plantilla para captar talento y/o ir formando profesionales de cara a futuro

- Otras (Explicar)

14.- ¿Se ha reunido alguna vez en los últimos dos años con responsables del hospital para evaluar el recambio generacional en trasplante?

15.- ¿Considera que está garantizado en su Unidad el recambio generacional?

16.- ¿Como crees que debería ser el acceso a trasplante por parte de cirujanos jóvenes?

- A través de Fellowship que genere una bolsa de cirujanos formados en trasplante

- Formación a demanda de las Unidades en función de las vacantes que surjan

- Otras

Añada el comentario que considere (Texto libre)
